# Supplementary material for: Helicobacter pylori Usurps Cell Polarity to Turn the Cell Surface into a Replicative Niche
Source: PubMed Central journal article supplement (PMC2669173; doi:10.1371/journal.ppat.1000407), 2009-05-01

Figure S2

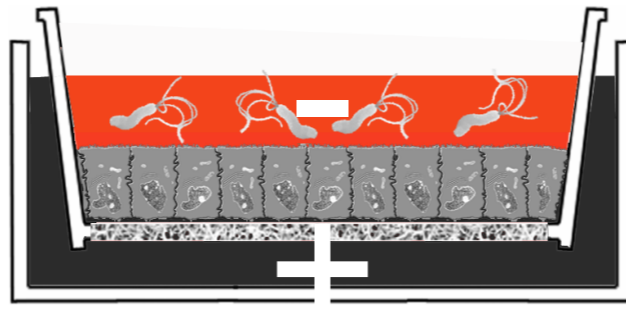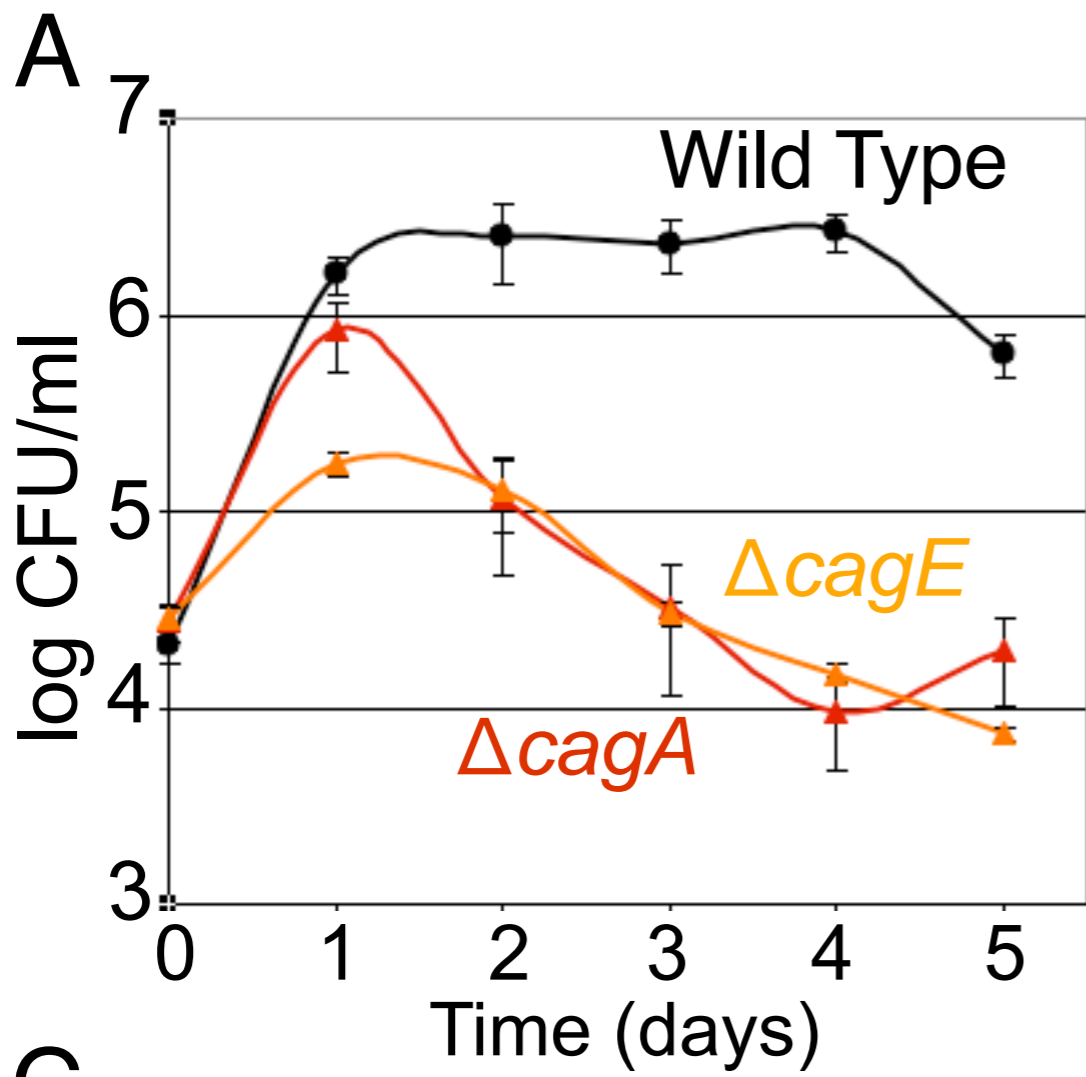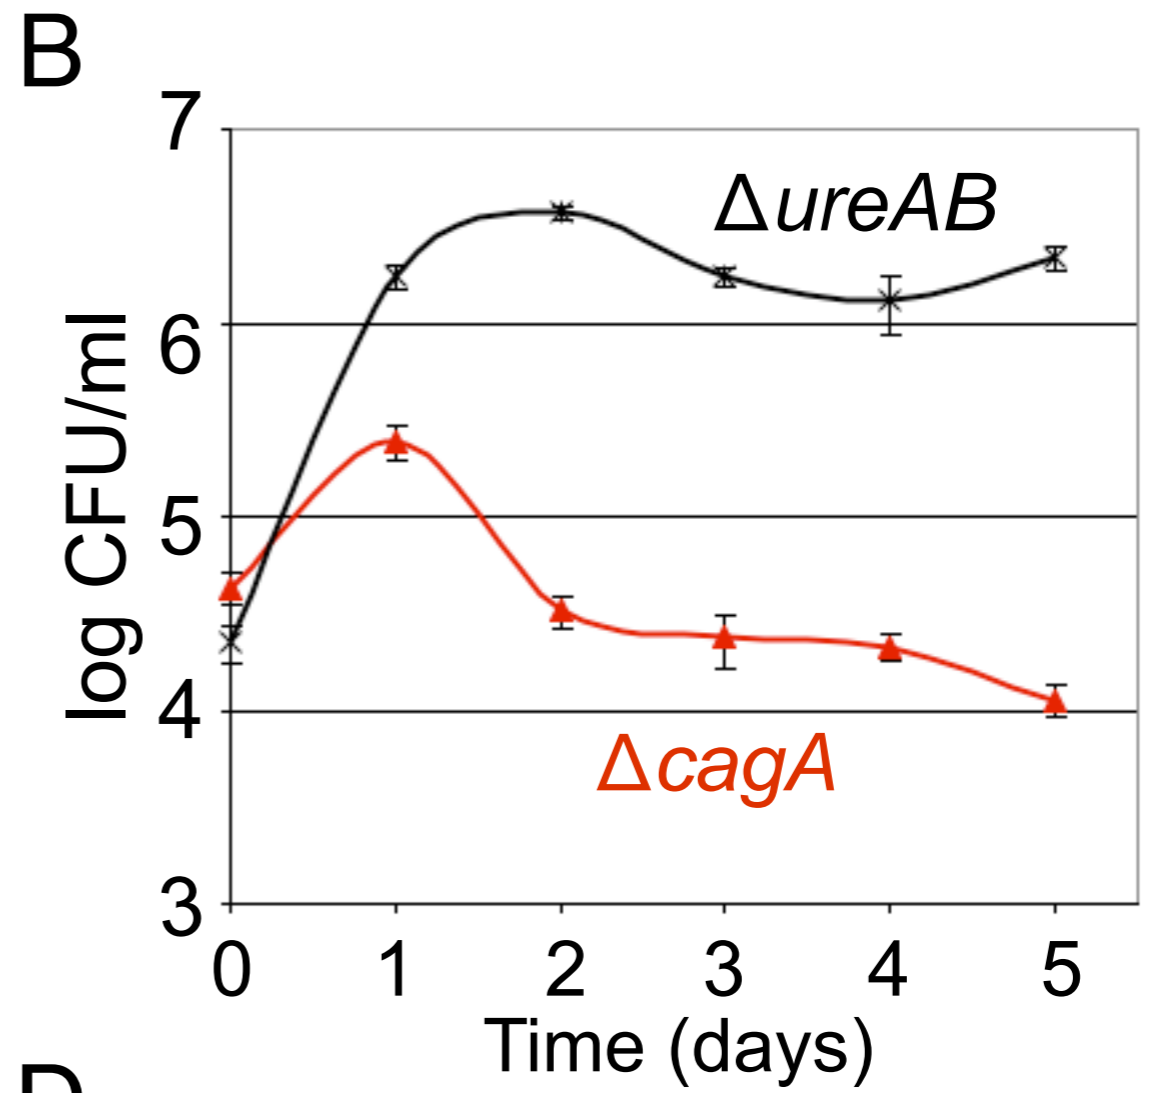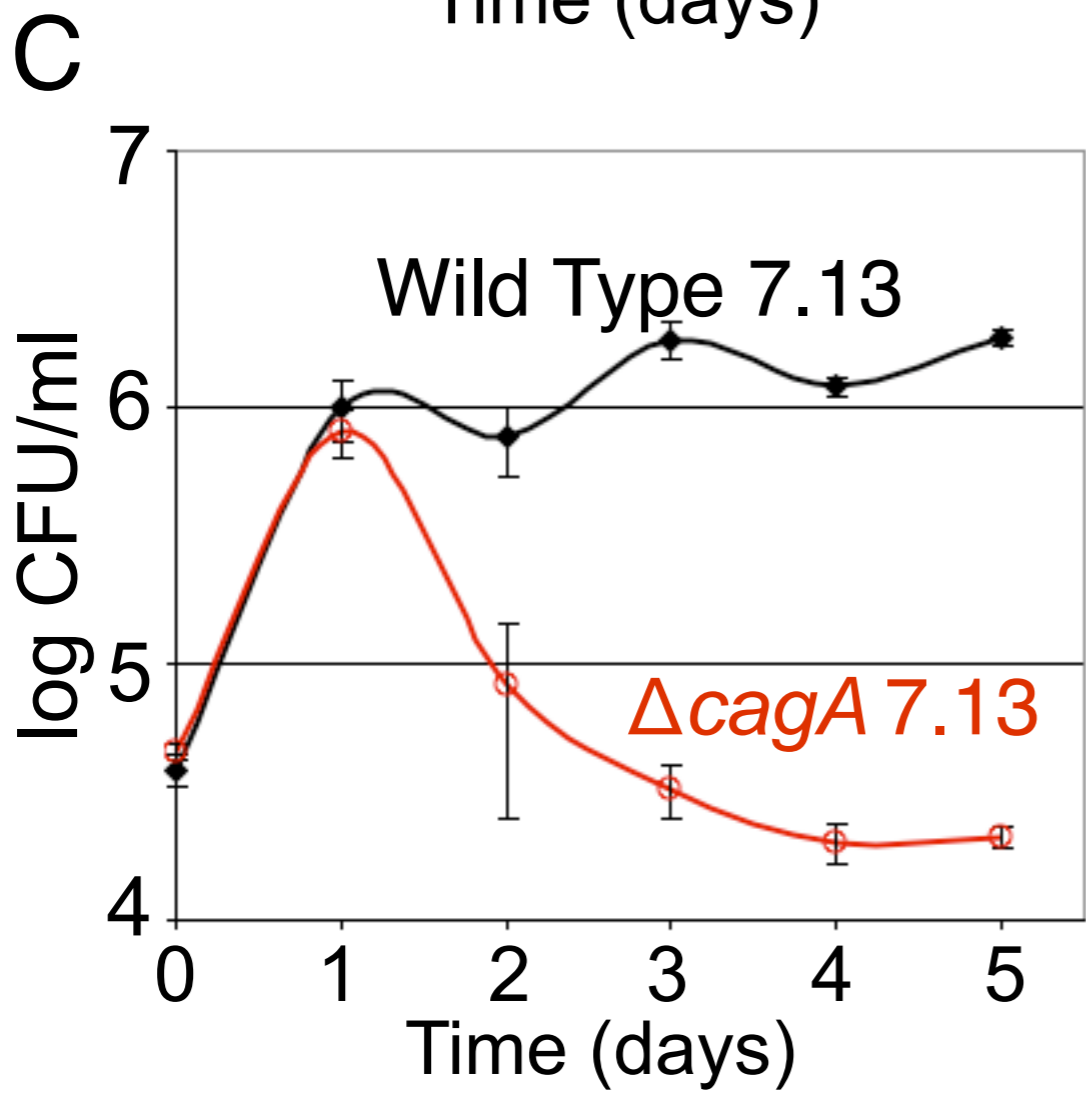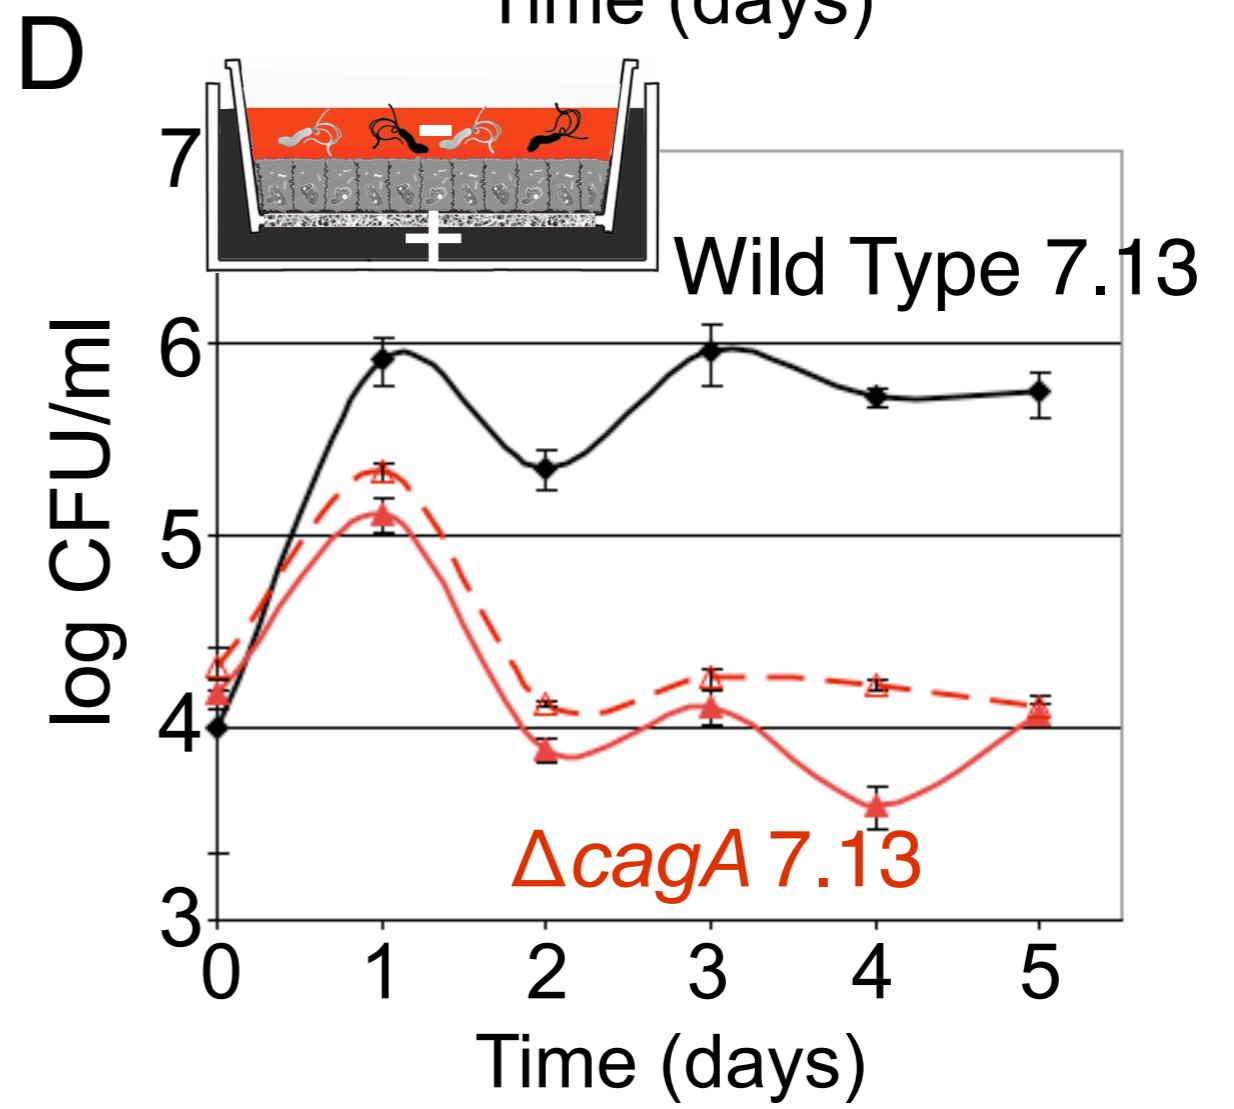

Supplement: ppat.1000407.s003.pdf [file ppat.1000407.s003.pdf]
